# Supplementary material for: ZIF-8 derived ZnO: a facile catalyst for ammonium perchlorate thermal decomposition
Source: Royal Society of Chemistry journal article supplement (doi:10.1039/d3su00256j), 2023-01-01
Supplement: d3su00256j1.pdf [file d3su00256j1.pdf]

**Supplementary Information:**

**ZIF-8 Derived ZnO: A Facile Catalyst for Ammonium Perchlorate Thermal Decomposition**

Gladiya Mani,<sup>a</sup> Aswathy V Kumar,<sup>a</sup> and Suresh Mathew <sup>\*a,b</sup>

**XRD Analysis:**

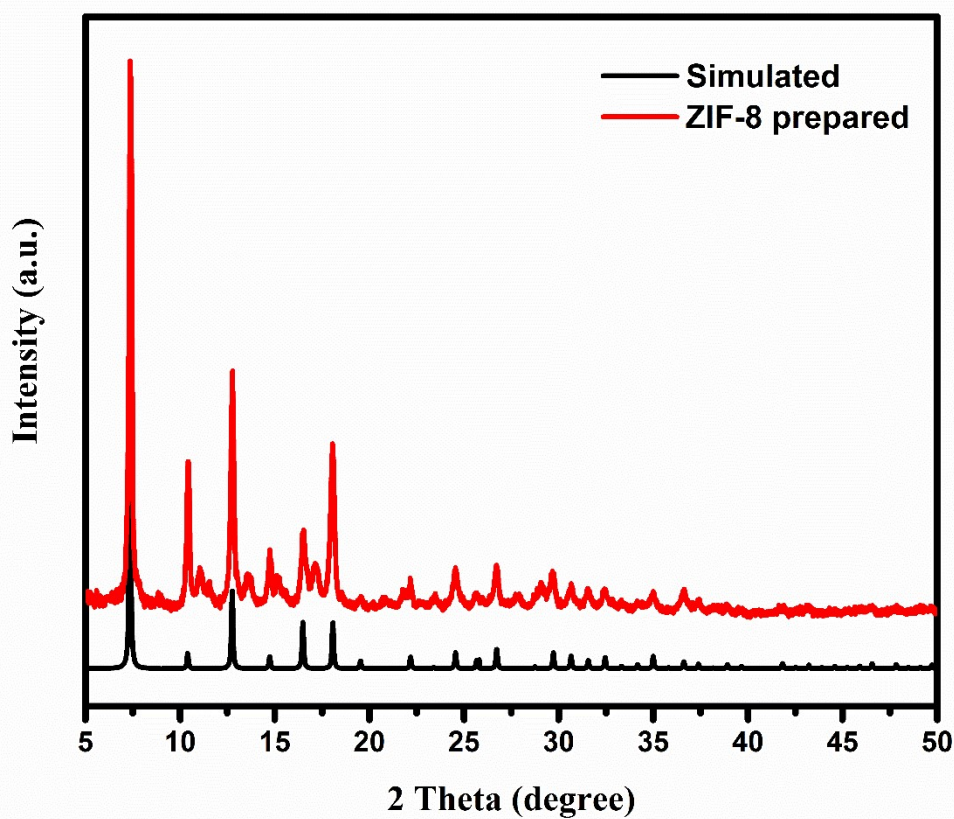

Fig. S1 XRD pattern of synthesized ZIF-8.

**FT-IR Analysis:**

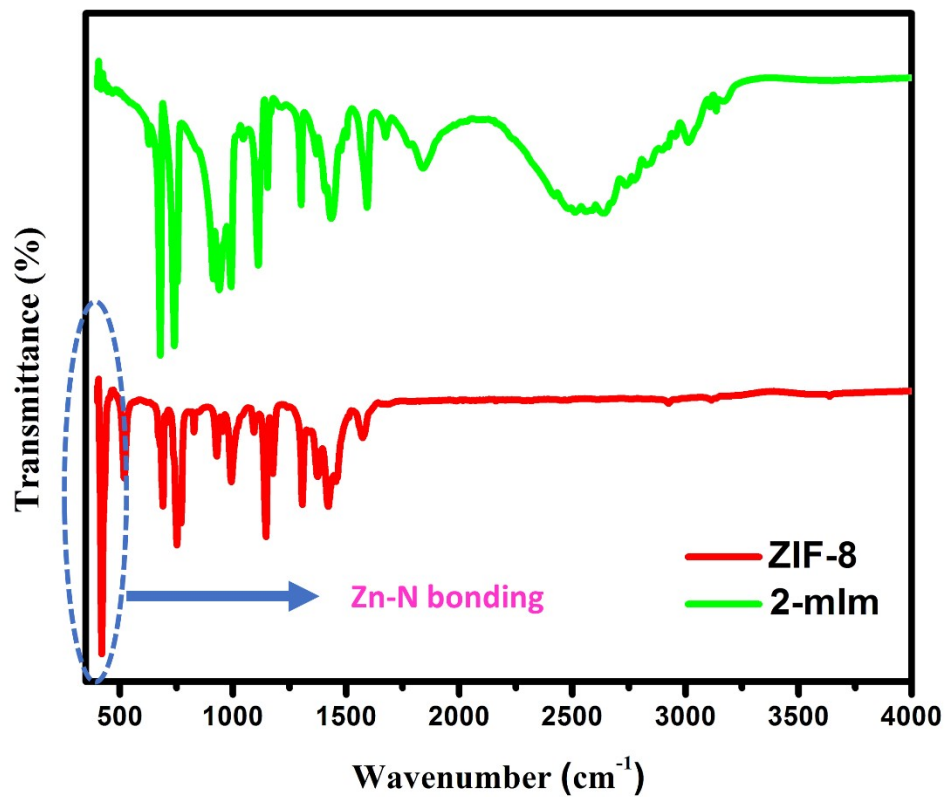

Fig. S2 FT-IR spectra of 2-Methylimidazole and synthesized ZIF-8.

**TEM Analysis:**

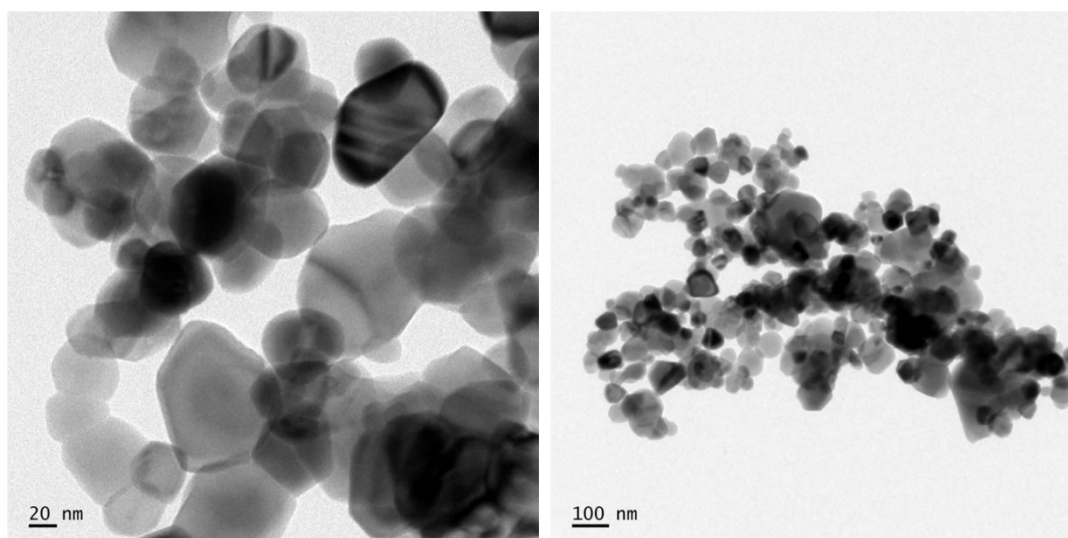

Fig. S3 TEM images of Z500 at different scales.

## UV-Vis Diffuse Reflectance Spectra:

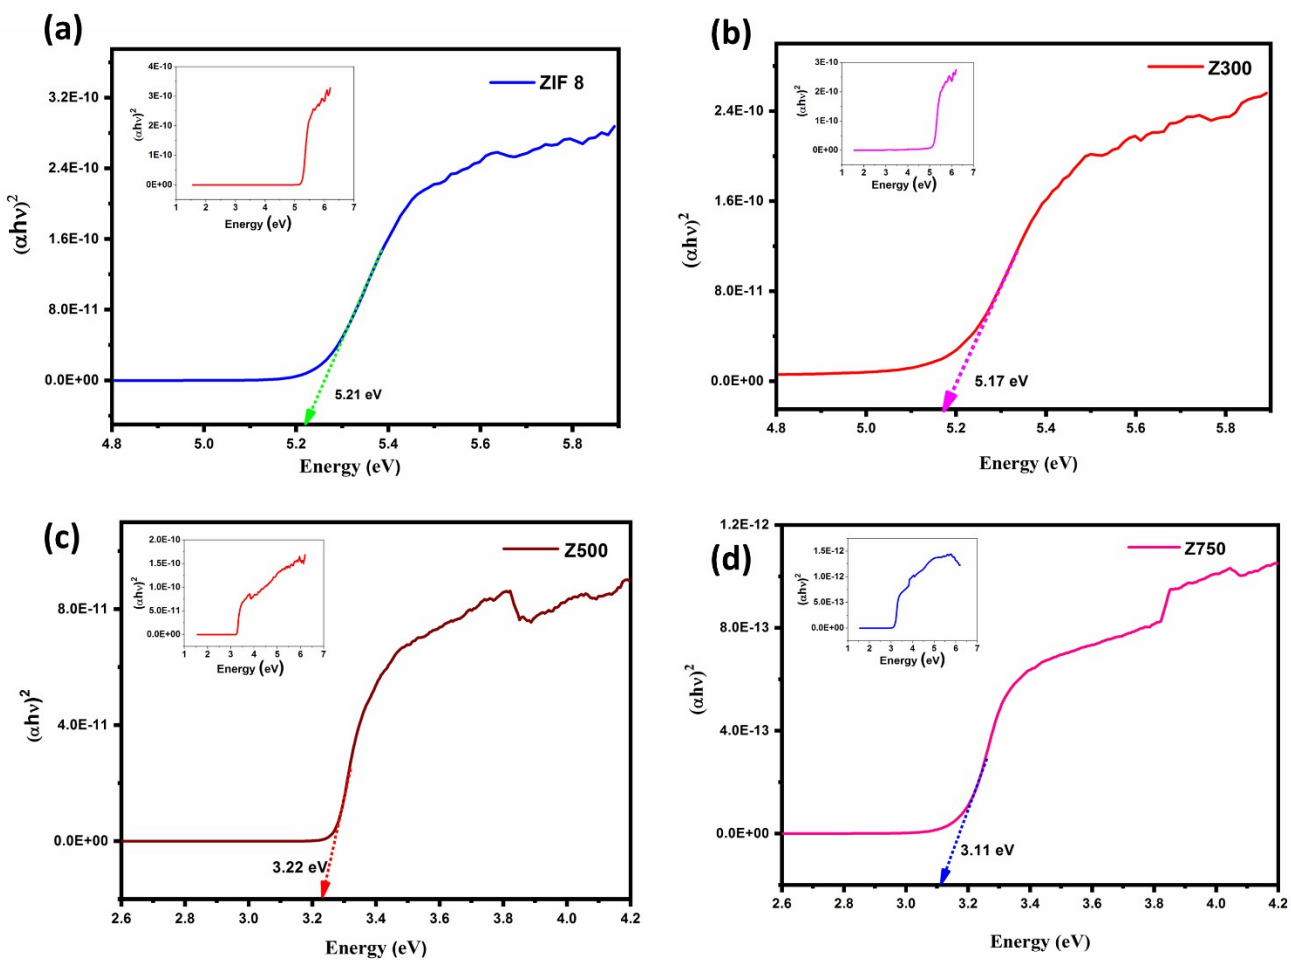

Fig. S4 Tauc-plots of (a) ZIF-8, (b) Z300, (c) Z500, and (d) Z750.

## BET Analysis:

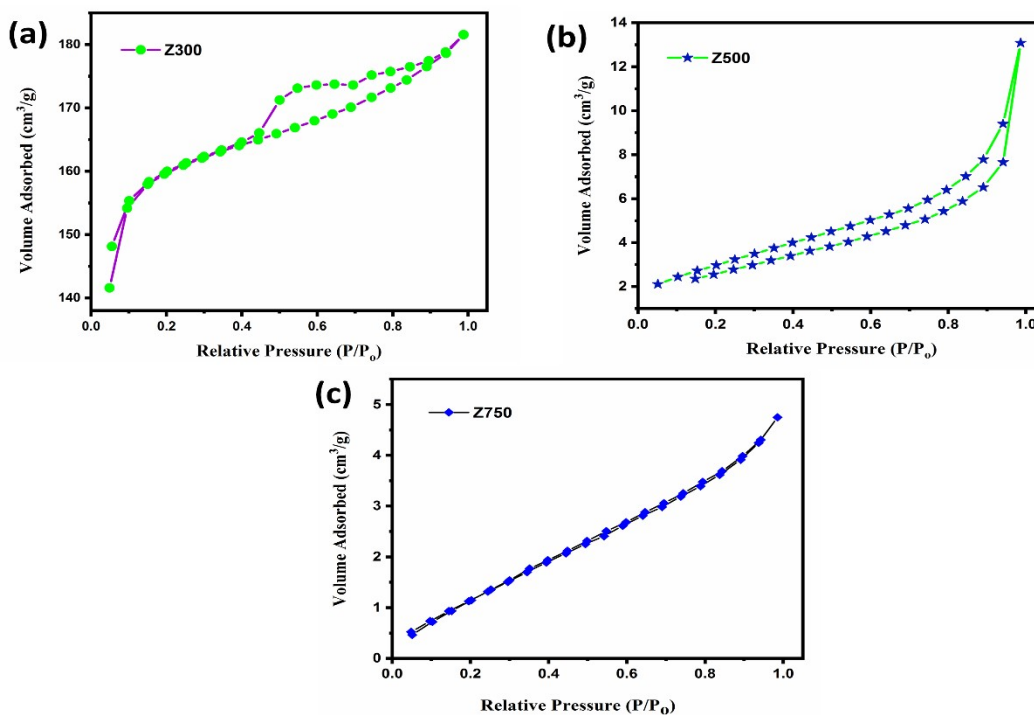

Fig. S5 N<sub>2</sub> adsorption – desorption isotherms of (a) Z300, (b) Z500, and (c) Z750.

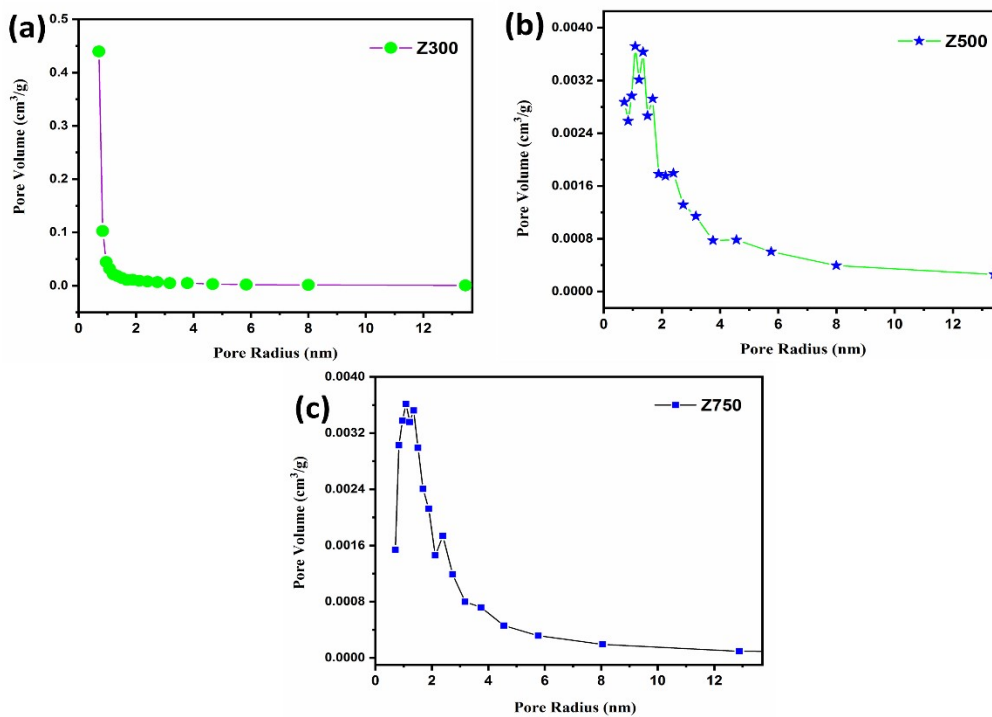

Fig. S6 Pore Size Distributions of (a) Z300, (b) Z500, and (c) Z750.

## XPS Analysis:

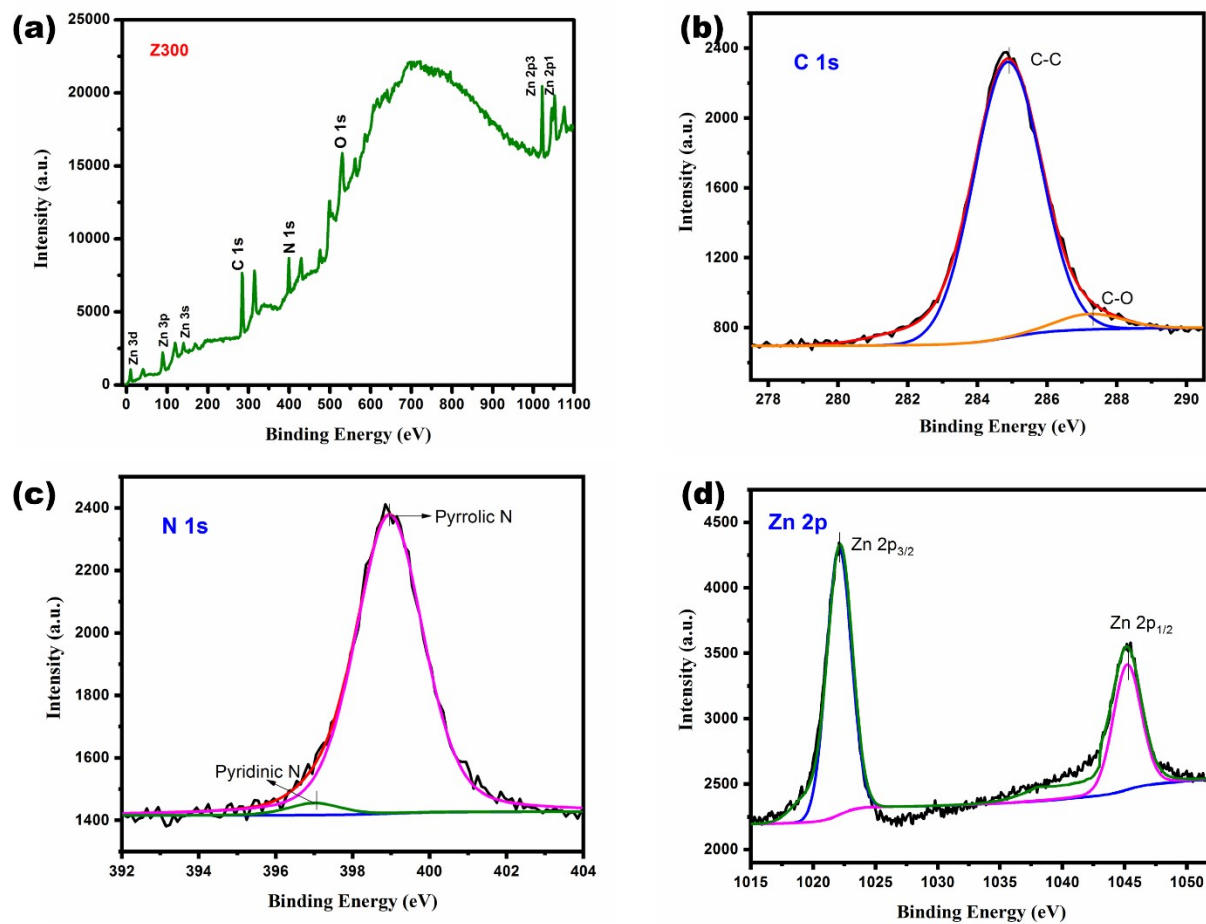

Fig. S7 XPS (a) survey spectrum, (b) C 1s, (c) N 1s, and (d) Zn 2p spectra of Z300.

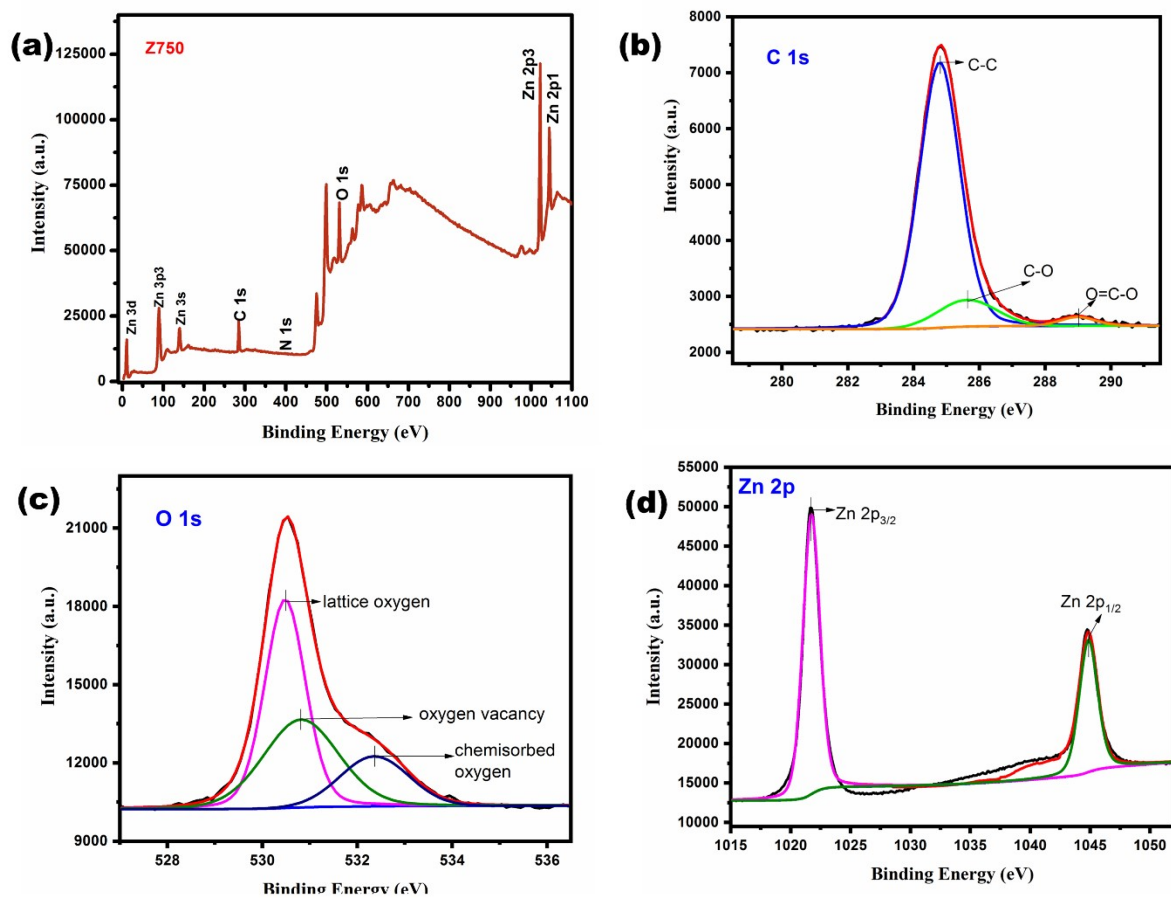

Fig. S8 XPS (a) survey spectrum, (b) C 1s, (c) O 1s, and (d) Zn 2p spectra of Z750.

Thermal Analysis: DTG Curves

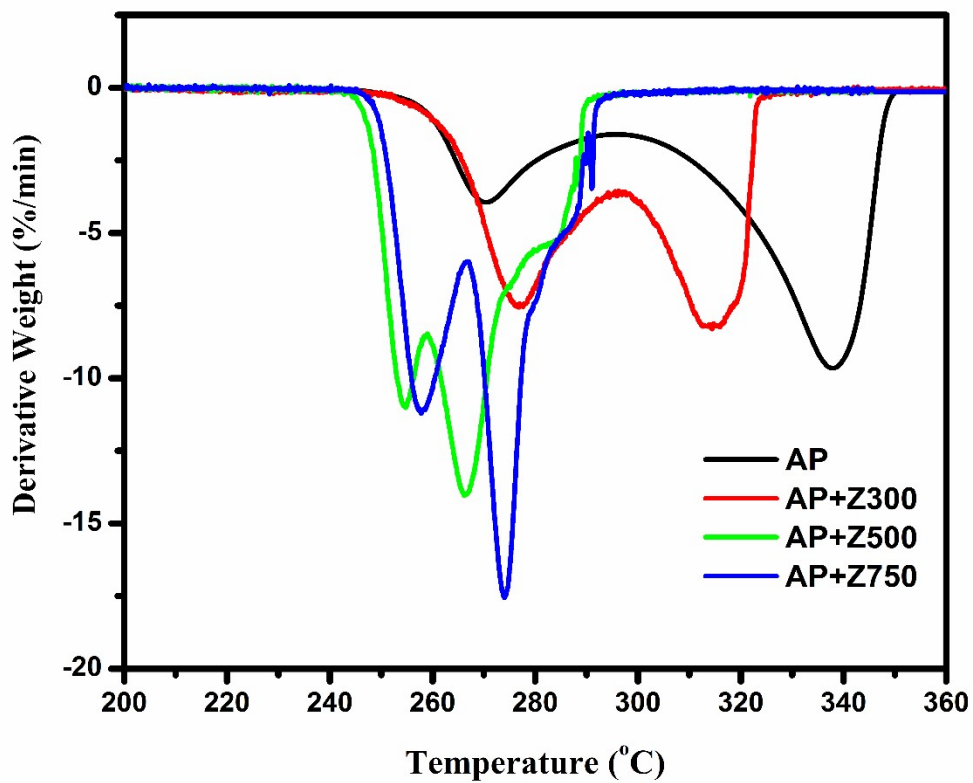

Fig. S9 DTG curves of AP with and without catalysts.

## TG-MS Curves:

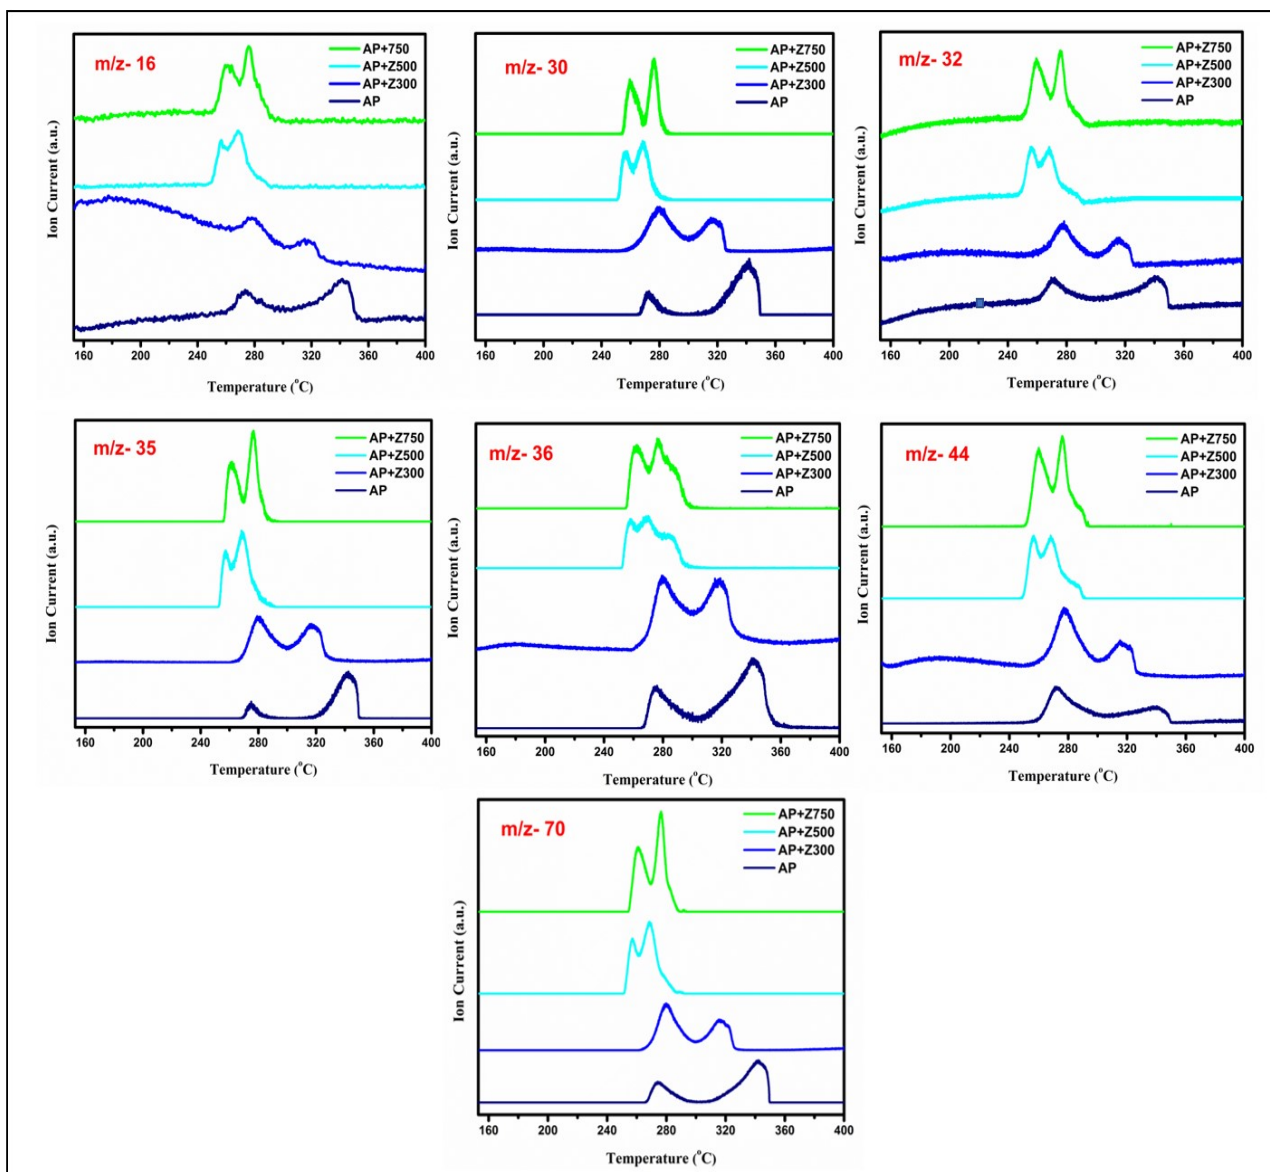

Fig. S10a TG-MS curves of AP decomposition with and without catalysts Z300, Z500 and Z750 at various m/z values



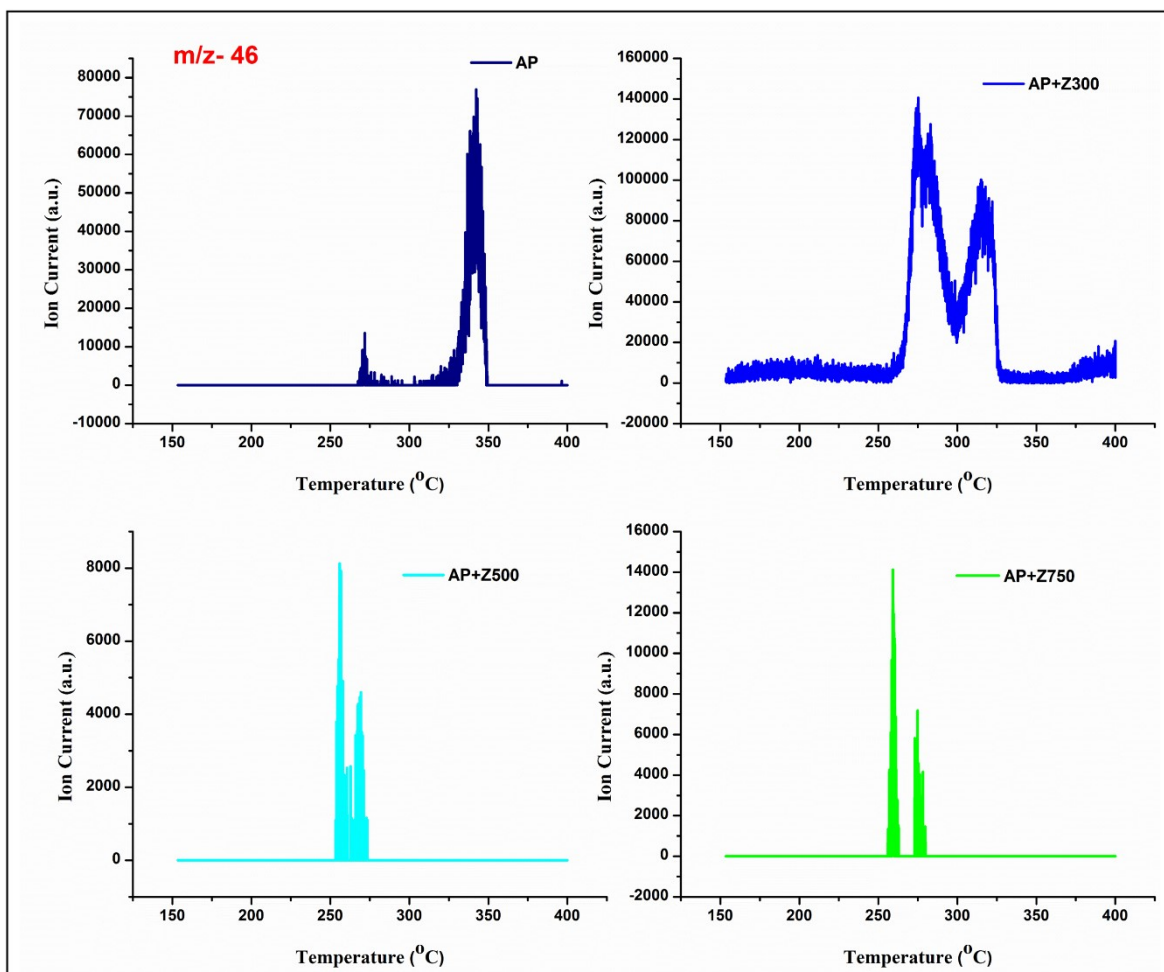

Fig. S10b TG-MS curves of AP decomposition with and without catalysts Z300, Z500 and Z750 at  $m/z$  value-46
